# Supplementary material for: Fe/Zn-modified tricalcium phosphate (TCP) biomaterials: preparation and biological properties
Source: Royal Society of Chemistry journal article supplement (doi:10.1039/c8ra08453j), 2019-01-01
Supplement: c8ra08453j1.pdf [file c8ra08453j1.pdf]

Supporting Information

# Fe/Zn-modified tricalcium phosphate (TCP) biomaterials: preparation and biological properties

Lu Xie <sup>a</sup>, Yuanyi Yang <sup>b</sup>, Zhiqiang Fu <sup>c</sup>, Yunfei Li <sup>d</sup>, Jiacheng Shi <sup>d</sup>,  
Daichuan Ma <sup>e</sup>, Suilin Liu <sup>e</sup>, Daibing Luo <sup>e\*</sup>

<sup>a</sup> State Key Laboratory of Oral Diseases, National Clinical Research Center for Oral Diseases, Department of Prosthodontic, West China Hospital of Stomatology, Sichuan University, Chengdu, 610041, China.

<sup>b</sup> Department of Materials Engineering, Sichuan College of Architectural Technology, Deyang, 618000, China.

<sup>c</sup> School of Chemical Engineering, Sichuan University, Chengdu, 610065, China.

<sup>d</sup> School of Materials Science and Engineering, Sichuan University, Chengdu, 610064, China.

<sup>e</sup> Analytical & Testing Center, Sichuan University, Chengdu 610064, China.

<sup>3</sup> College of Materials Science and Engineering, Sichuan University, Chengdu 610064, China.

Correspondence: luodb@scu.edu.cn; Tel: +86-28-85412949

## 1 characterization

### 1. Cell parameter

Table S1 Cell Parameters of Fe-TCP

| Sample              | a       | b       | c      | Density (c) |
|---------------------|---------|---------|--------|-------------|
| <b>β-TCP</b>        | 10.429  | 10.429  | 37.38  | 3.12        |
| <b>Fe-TCP (2%)</b>  | 10.429  | 10.429  | 37.38  | 3.12        |
| <b>Fe-TCP (5%)</b>  | 10.3799 | 10.3799 | 37.234 | 3.159       |
| <b>Fe-TCP (10%)</b> | 10.3382 | 10.3382 | 37.125 | 3.1         |

Table 21 Cell Parameters of Zn-TCP

| Sample              | a      | b      | c      | Density (c) |
|---------------------|--------|--------|--------|-------------|
| <b>β-TCP</b>        | 10.429 | 10.429 | 37.38  | 3.12        |
| <b>Zn-TCP (2%)</b>  | 10.429 | 10.429 | 37.38  | 3.12        |
| <b>Zn-TCP (5%)</b>  | 10.357 | 10.357 | 37.173 | 3.205       |
| <b>Zn-TCP (10%)</b> | 10.357 | 10.357 | 37.173 | 3.205       |

## 1. IR characterization

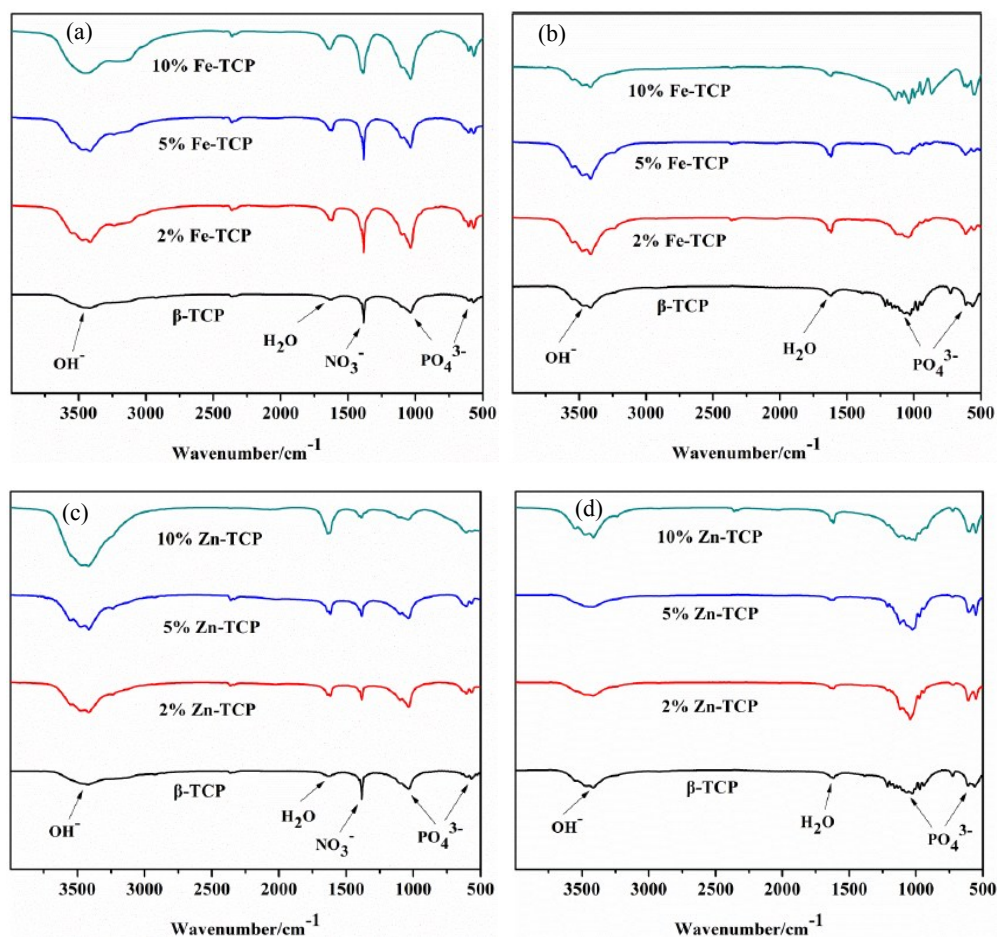

Figure S1. FT-IR spectrum of (a) Fe-TCP precursor; (b) Fe-TCP; (c) Zn-TCP precursor; (d) Zn-TCP.

Characteristic peaks

$\text{PO}_4^{3-}$ :  $1030\text{cm}^{-1}$ ,  $600\text{cm}^{-1}$

$\text{NO}_3^-$ :  $1380\text{cm}^{-1}$

$\text{H}_2\text{O}$ :  $3400\text{cm}^{-1}$ ,  $1640\text{cm}^{-1}$

The  $\beta$ -TCP and Fe-TCP have highly similar peak features since the IR characterization is sensitive to organic groups. The couple splitting of the P-O vibration peaks may be caused by the replacement of part  $\text{Ca}^{2+}$  by  $\text{Fe}^{3+}$  and the shrinking of the crystalline cell.

## 2. SEM

Interconnection micropores ( $400\sim 600\mu\text{m}$ ) can be clearly observed on all the three samples. When the  $\text{Fe}^{3+}$  content reached to 10%, the crystalline size increased and tended to accumulate together. When the  $\text{Fe}^{3+}$  content was 2% or 5%, there are micropores with  $1\mu\text{m}$  dispersed in the structure. The crystalline size increased with the  $\text{Fe}^{3+}$  doping level increased, which may be caused by the deformation and shrinking of the crystalline cells due to the replacement of  $\text{Ca}^{2+}$  by  $\text{Fe}^{3+}$ . In this case, many crystals accumulated together forming larger crystals and the fuse point decreased after the agglomeration treatment.

The EDS results of Fe/Zn-TCP with 2%, 5%, and 10% content are illustrated as (d), (e), and (f) parts in Figure S2 and S3. The result that the replacement of  $\text{Ca}^{2+}$  by  $\text{Fe}^{3+}$  was confirmed by the EDS analysis combined with the XPS results (Figure 4. The mole ratio of  $\text{Fe}/(\text{Ca}+\text{Fe})$  is higher than the theoretical

calculation, which may be explained by the emergence of vacancy defect to balance the charge due to the metal ion replacement in the crystalline cell. Under the high-resolution SEM, there are micropores of 1  $\mu\text{m}$  with irregular shape dispersed in the structure. The crystalline particles got larger with the increased content of the doped  $\text{Fe}^{3+}/\text{Zn}^{2+}$  ions.

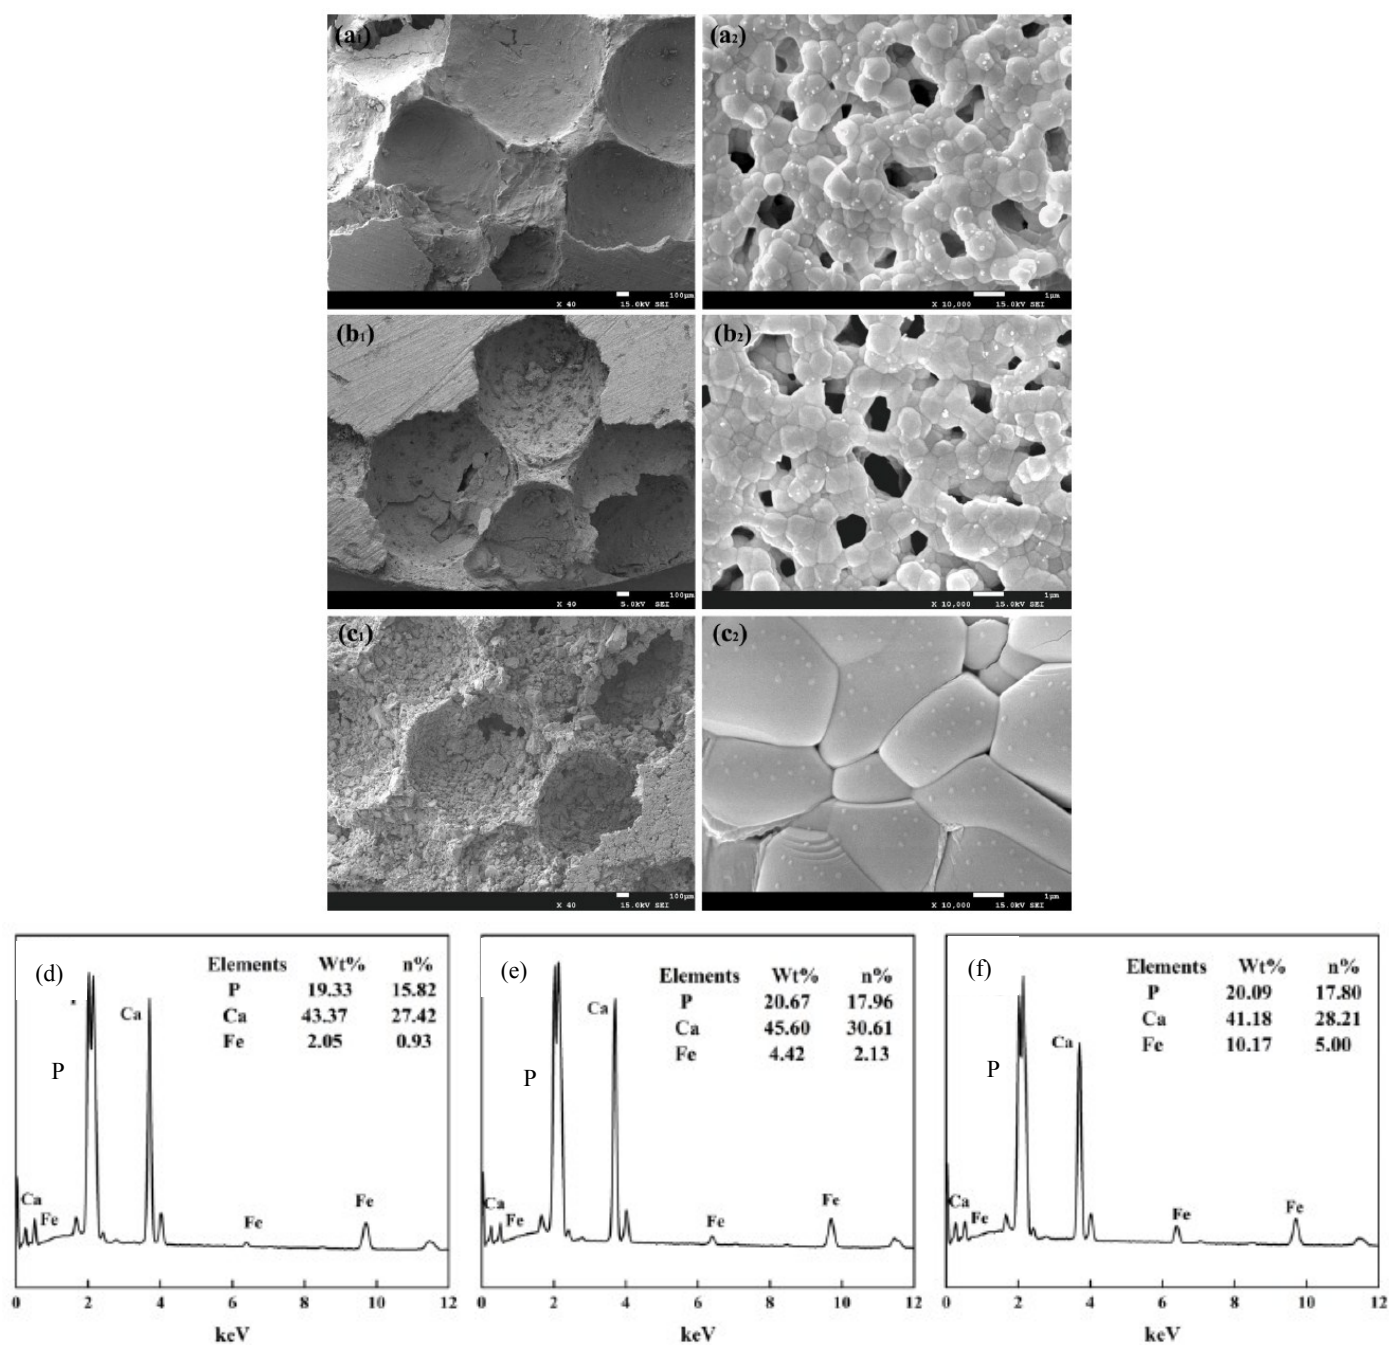

Figure S2. SEM images of Fe-TCP of (a1) (a2) 2%; (b1) (b2) 5%; (c1) (c2) 10%; EDS of Fe-TCP of (d) 2%; (e) 5%; (f) 10%.

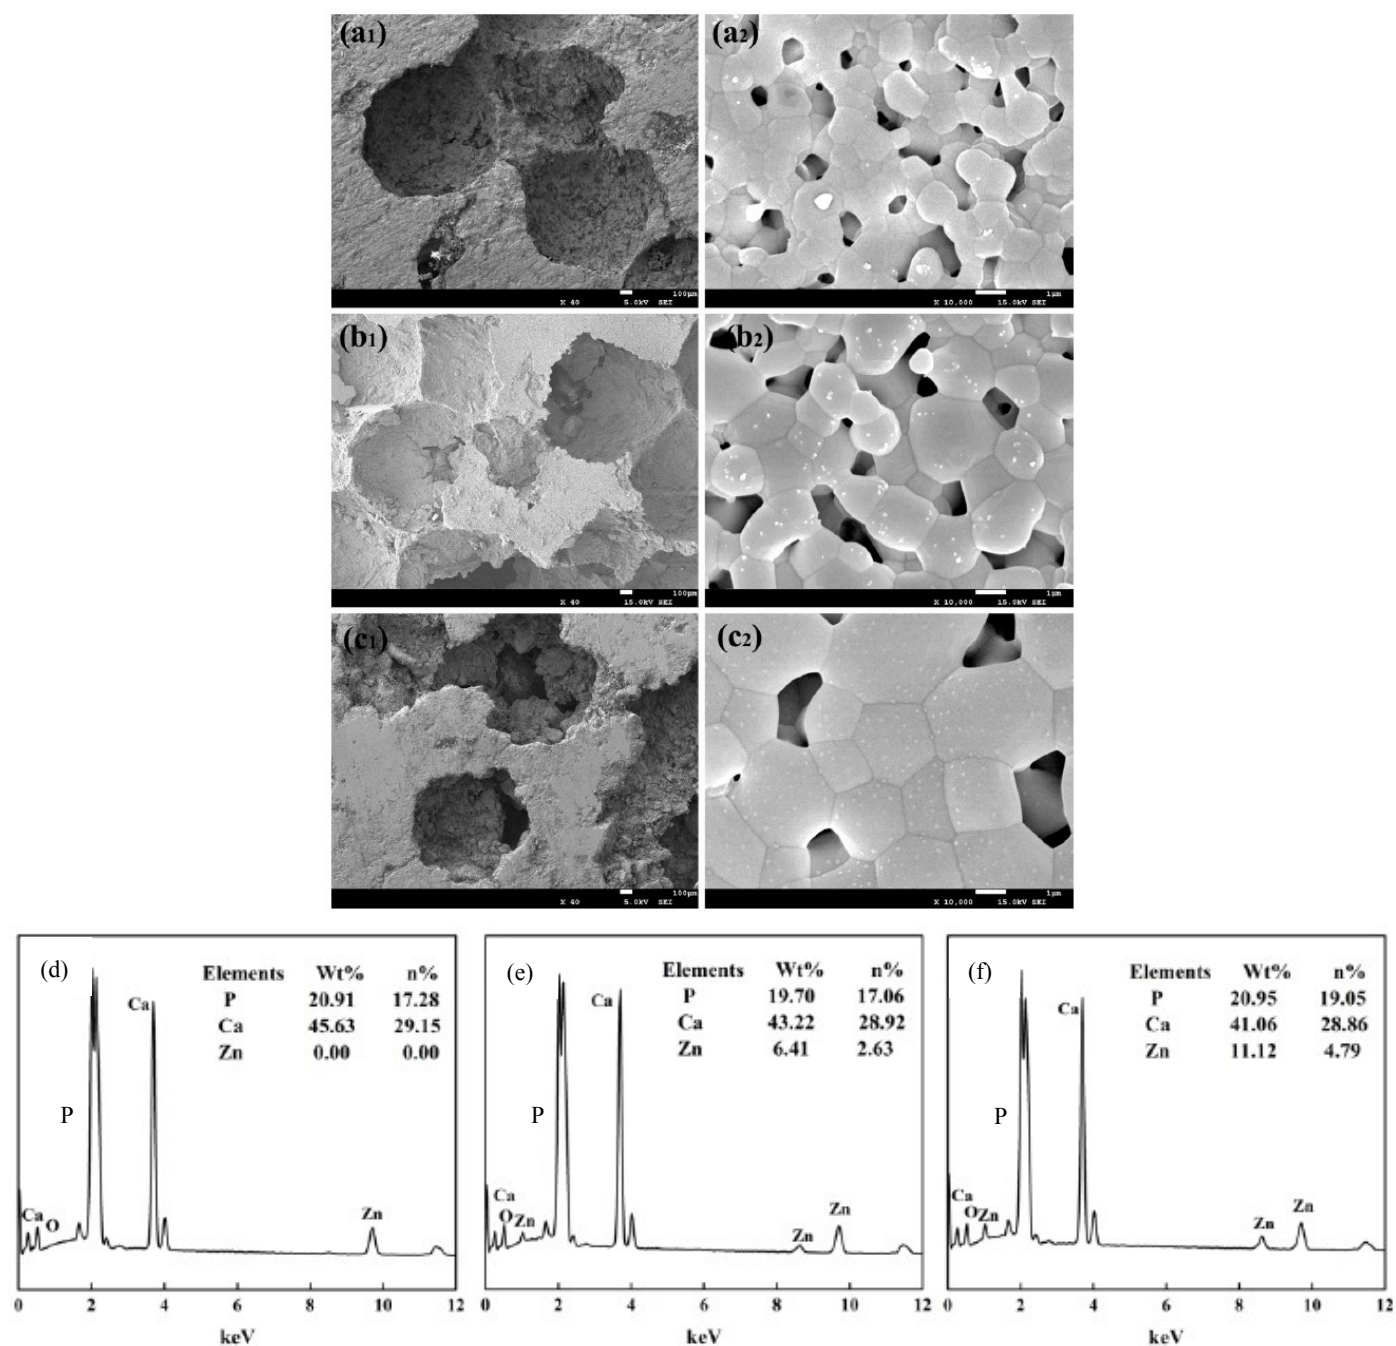

Figure S3. SEM images of Zn-TCP of (a1) (a2) 2%; (b1) (b2) 5%; (c1) (c2) 10%; EDS of Zn-TCP of (d) 2%; (e) 5%; (f) 10%.

### 3. TEM

The TEM images of the Fe/Zn-TCP materials are shown in Figure S4 and S5. The 2%, 5%, and 10% metal-content are indicated as (a), (b), and (c) for each kind of the metal-TCP sample, respectively. All the samples have tiny needle- or rod-like shape with the length of about 100 nm. It can be seen that the doping of Fe/Zn into the cell lattice has little influence on the microstructure and morphology of the TCP species.

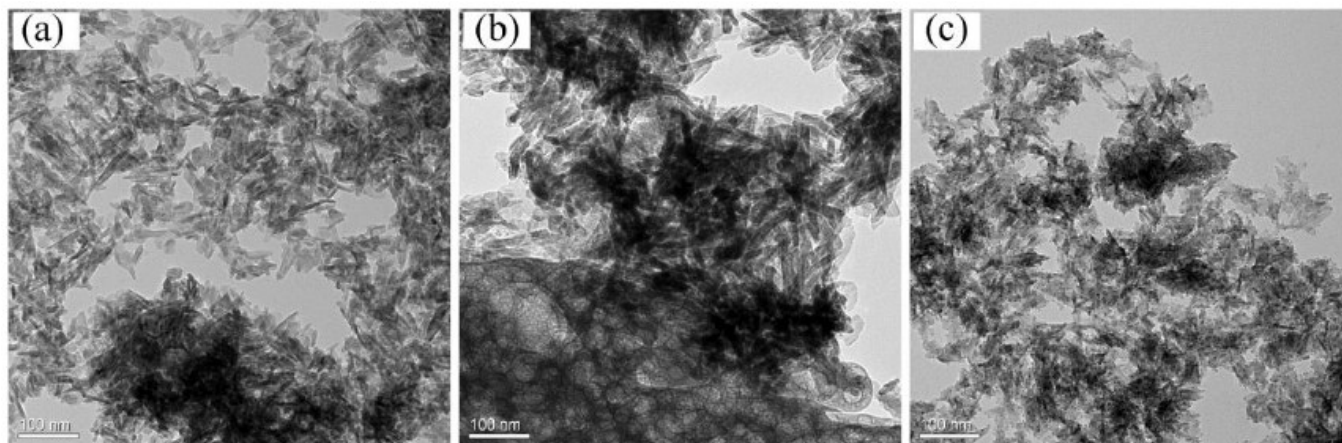

Figure S4. TEM images of Fe-TCP of (a) 2%; (b) 5%; (c) 10%.

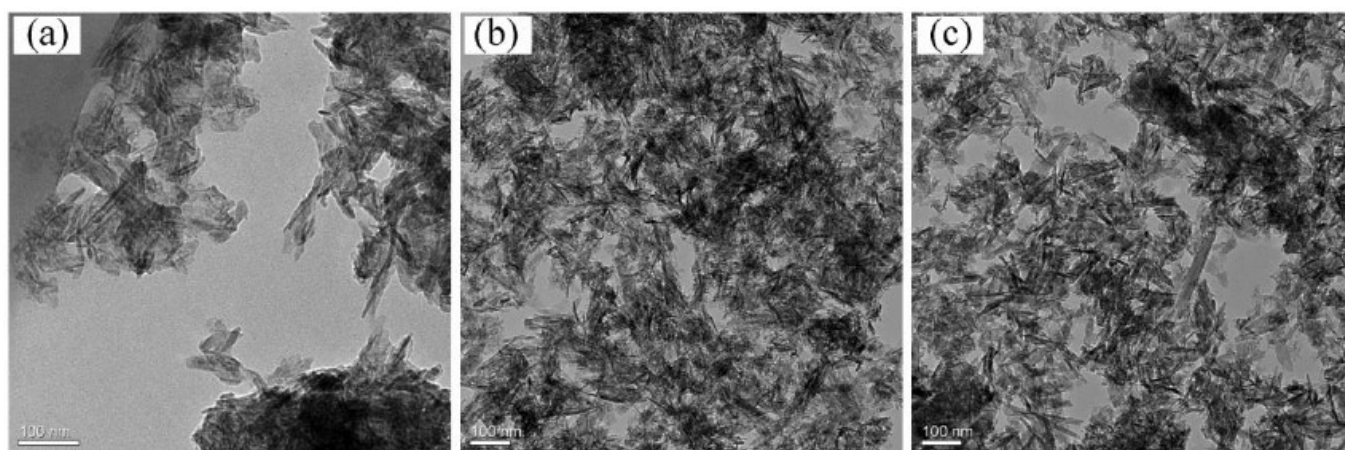

Figure S5. TEM images of Fe-TCP of (a) 2%; (b) 5%; (c) 10%.
